# Supplementary material for: Protective V127 prion variant prevents prion disease by interrupting the formation of dimer and fibril from molecular dynamics simulations
Source: PubMed Central journal article supplement (PMC4764842; doi:10.1038/srep21804), 2016-02-24
Supplement: srep21804-s1.pdf [file srep21804-s1.pdf]

**Protective V127 prion variant prevents prion disease by interrupting the  
formation of dimer and fibril from molecular dynamics simulations**

Shuangyan Zhou<sup>1,2</sup>, Danfeng Shi<sup>2</sup>, Xuewei Liu<sup>2</sup>, Huanxiang Liu<sup>1\*</sup>, Xiaojun Yao<sup>2,3\*</sup>

<sup>1</sup>School of Pharmacy, Lanzhou University, Lanzhou 730000, China

<sup>2</sup>State Key Laboratory of Applied Organic Chemistry and Department of Chemistry,  
Lanzhou University, Lanzhou 730000, China

<sup>3</sup>State Key Laboratory of Quality Research in Chinese Medicine, Macau Institute for  
Applied Research in Medicine and Health, Macau University of Science and  
Technology, Taipa, Macau, China

\* Corresponding author

Tel.: +86-931-891-2578

Fax: +86-931-891-2582

E-mail address: [hxliu@lzu.edu.cn](mailto:hxliu@lzu.edu.cn), [xjyao@lzu.edu.cn](mailto:xjyao@lzu.edu.cn)

Table S1. The simulated systems

| System                                    | System mark       | Atom number | Chain number | Simulation time |
|-------------------------------------------|-------------------|-------------|--------------|-----------------|
| PrP dimer<br>(residues<br>125-228)        | G127M129/G127M129 | 3388        | 2            | 100 ns          |
|                                           | G127V129/G127V129 | 3386        | 2            | 100 ns          |
|                                           | V127M129/V127M129 | 3406        | 2            | 100 ns          |
|                                           | V127M129/G127M129 | 3397        | 2            | 100 ns          |
|                                           | V127M129/G127V129 | 3396        | 2            | 100 ns          |
| $\beta$ 1 fibril<br>(residues<br>126-131) | G127M129          | 1296        | 16           | 100 ns          |
|                                           | G/V127M129        | 1368        | 16           | 100 ns          |
|                                           | V127M129          | 1440        | 16           | 100 ns          |
|                                           | G127V129          | 1280        | 16           | 100 ns          |

Table S2. The average secondary structure contents of monomers

| System            | Monomer | Helix (%)        | $\beta$ -sheet (%) | Coil (%)         | Turn (%)         |
|-------------------|---------|------------------|--------------------|------------------|------------------|
| G127M129/G127M129 | M1      | 53.70 $\pm$ 0.14 | 6.27 $\pm$ 0.01    | 29.03 $\pm$ 0.11 | 11.00 $\pm$ 0.24 |
|                   | M2      | 57.94 $\pm$ 0.09 | 4.31 $\pm$ 0.00    | 27.28 $\pm$ 0.08 | 10.47 $\pm$ 0.21 |
| G127V129/G127V129 | M1      | 53.28 $\pm$ 0.07 | 4.33 $\pm$ 0.01    | 30.77 $\pm$ 0.11 | 11.62 $\pm$ 0.22 |
|                   | M2      | 54.58 $\pm$ 0.07 | 5.29 $\pm$ 0.04    | 25.87 $\pm$ 0.08 | 14.26 $\pm$ 0.16 |
| V127M129/V127M129 | M1      | 53.05 $\pm$ 0.11 | 4.26 $\pm$ 0.01    | 26.75 $\pm$ 0.10 | 15.94 $\pm$ 0.27 |
|                   | M2      | 56.89 $\pm$ 0.07 | 4.21 $\pm$ 0.01    | 29.76 $\pm$ 0.10 | 9.14 $\pm$ 0.17  |
| V127M129/G127M129 | M1      | 54.57 $\pm$ 0.11 | 4.83 $\pm$ 0.02    | 25.93 $\pm$ 0.12 | 14.67 $\pm$ 0.33 |
|                   | M2      | 59.24 $\pm$ 0.06 | 4.34 $\pm$ 0.01    | 30.00 $\pm$ 0.07 | 6.43 $\pm$ 0.16  |
| V127M129/G127V129 | M1      | 55.99 $\pm$ 0.07 | 3.98 $\pm$ 0.00    | 25.21 $\pm$ 0.08 | 14.82 $\pm$ 0.19 |
|                   | M2      | 52.90 $\pm$ 0.10 | 4.21 $\pm$ 0.01    | 27.76 $\pm$ 0.09 | 15.13 $\pm$ 0.24 |

Table S3. The interlayer binding free energies (kcal/mol) obtained by MM-GBSA method. A, B, C, D, in the table represent for the four layers in fibril structures.

| System     | layer-layer  | $\Delta E_{\text{ele}}$ | $\Delta E_{\text{vdw}}$ | $\Delta G_{\text{sol\_np}}$ | $\Delta G_{\text{sol\_polar}}$ | $\Delta G_{\text{polar}}$ | $\Delta G_{\text{nonpolar}}$ | $\Delta G_{\text{bind}}$ |
|------------|--------------|-------------------------|-------------------------|-----------------------------|--------------------------------|---------------------------|------------------------------|--------------------------|
| G127M129   | A-B          | -31.44                  | -59.53                  | -8.35                       | 62.93                          | 31.49                     | -67.88                       | -36.39                   |
|            | B-C          | -32.80                  | -59.15                  | -8.33                       | 63.73                          | 30.93                     | -67.48                       | -36.55                   |
|            | C-D          | -27.75                  | -56.61                  | -8.16                       | 58.92                          | 31.17                     | -64.77                       | -33.60                   |
|            | <b>Total</b> | <b>-91.99</b>           | <b>-175.29</b>          | <b>-24.84</b>               | <b>185.58</b>                  | <b>93.59</b>              | <b>-200.13</b>               | <b>-106.54</b>           |
| G/V127M129 | A-B          | -38.31                  | -51.95                  | -7.54                       | 69.47                          | 31.16                     | -59.49                       | -28.33                   |
|            | B-C          | -46.28                  | -35.01                  | -6.18                       | 71.50                          | 25.22                     | -41.19                       | -15.97                   |
|            | C-D          | -72.41                  | -36.11                  | -6.24                       | 101.29                         | 28.88                     | -42.35                       | -13.48                   |
|            | <b>Total</b> | <b>-157.00</b>          | <b>-123.07</b>          | <b>-19.96</b>               | <b>242.26</b>                  | <b>85.26</b>              | <b>-143.03</b>               | <b>-57.78</b>            |
| V127M129   | A-B          | -68.46                  | -50.91                  | -8.05                       | 97.95                          | 29.49                     | -58.96                       | -29.47                   |
|            | B-C          | -44.16                  | -41.55                  | -6.98                       | 74.68                          | 30.52                     | -48.53                       | -18.01                   |
|            | C-D          | -15.24                  | -57.41                  | -8.14                       | 46.50                          | 31.26                     | -65.55                       | -34.29                   |
|            | <b>Total</b> | <b>-127.86</b>          | <b>-149.87</b>          | <b>-23.17</b>               | <b>219.13</b>                  | <b>91.27</b>              | <b>-173.04</b>               | <b>-81.77</b>            |
| G127V129   | A-B          | -54.72                  | -60.56                  | -9.15                       | 91.21                          | 36.49                     | -69.71                       | -33.22                   |
|            | B-C          | -101.70                 | -59.15                  | -9.38                       | 140.72                         | 39.02                     | -68.53                       | -29.50                   |
|            | C-D          | -42.18                  | -60.57                  | -9.45                       | 80.13                          | 37.95                     | -70.02                       | -32.07                   |
|            | <b>Total</b> | <b>-198.60</b>          | <b>-180.28</b>          | <b>-27.98</b>               | <b>312.06</b>                  | <b>113.46</b>             | <b>-208.26</b>               | <b>-94.79</b>            |

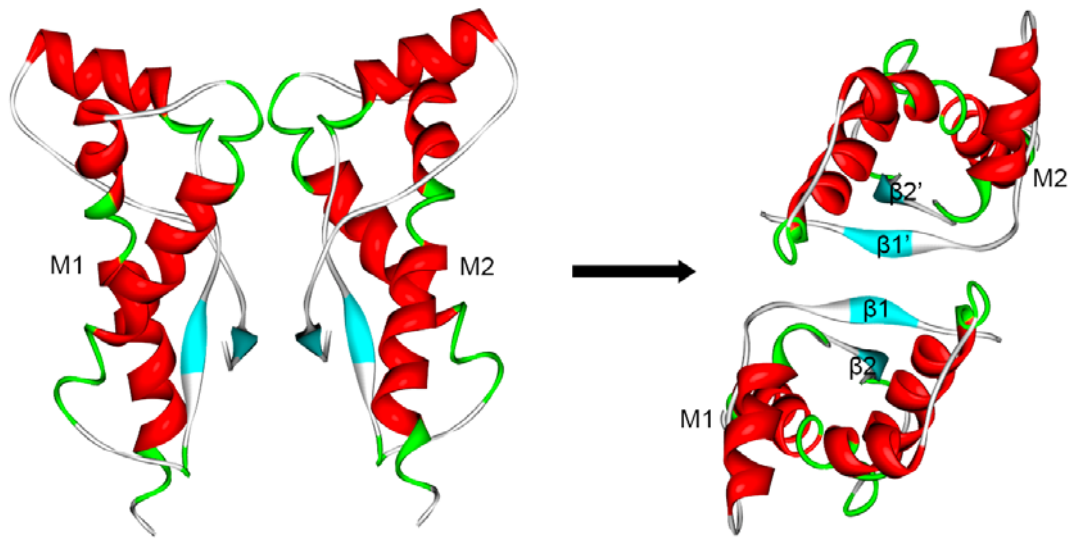

**Figure S1.** The constructed initial structure of dimer of prion protein and the detailed construction was described in method section in the text. M1, M2 represent for two monomers in dimer.  $\beta 1$ ,  $\beta 2$ ,  $\beta 1'$  and  $\beta 2'$  represent for four  $\beta$  strands, respectively.

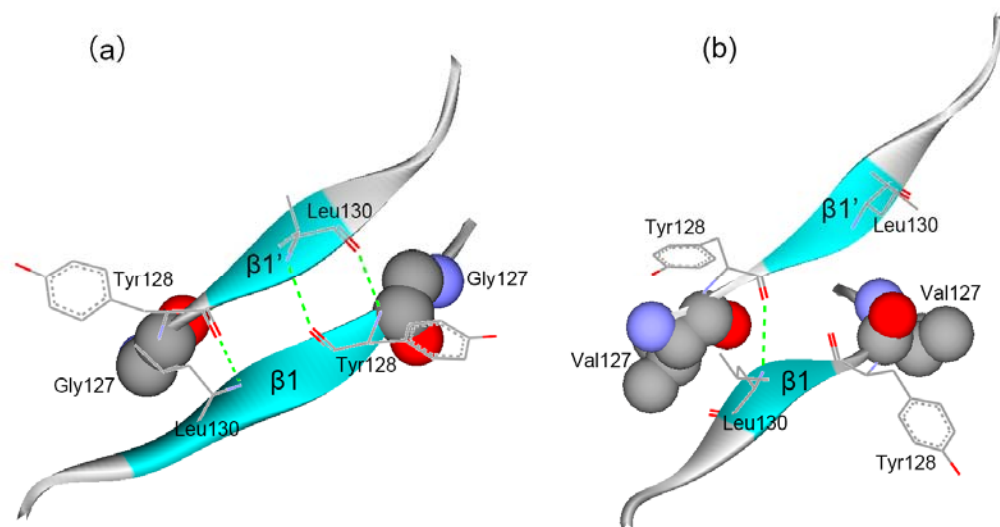

**Figure S2.** The extracted representative structure of  $\beta 1$  and  $\beta 1'$ , (a) G127M129/G127M129, (b) V127M129/V127M129. The residues formed hydrogen bonds were labeled and shown as line. Glycine and valine at 127 were displayed as ball and hydrogen bond was shown in green with dash line.

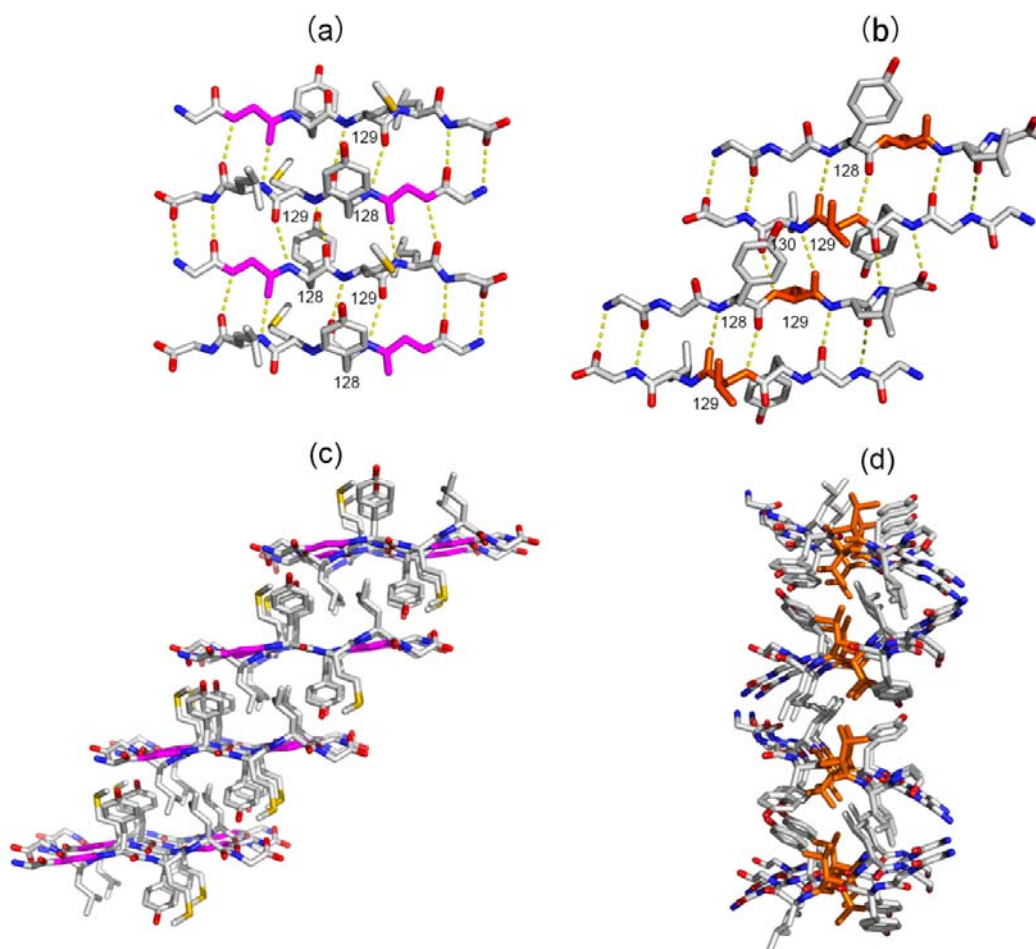

**Figure S3.** The extracted 16-mer structures of G127M129 and G127V129: (a) H-bonding pattern of G127M129, (b) H-bonding pattern of G127V129, (c) the steric zipper structure of G127M129 fibril and (d) steric zipper structure of G127V129fibril. For clarity, the glycine at 127 was highlighted in magenta and valine at 129 was highlighted in orange.
